# Supplementary material
Source: publisher figshare collection journal article supplement (https://plos.figshare.com/articles/dataset/_/5511367)

**A**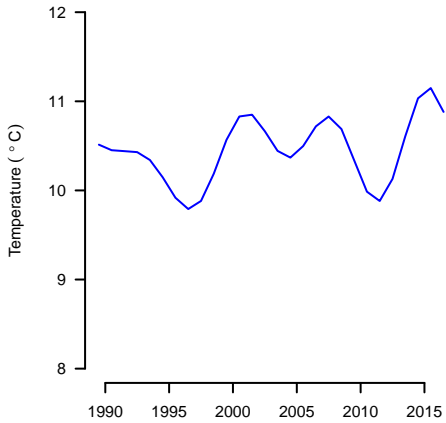**D**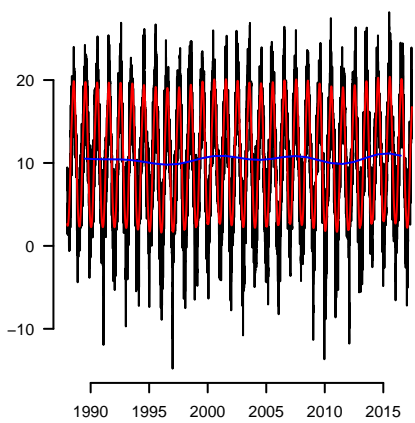**G**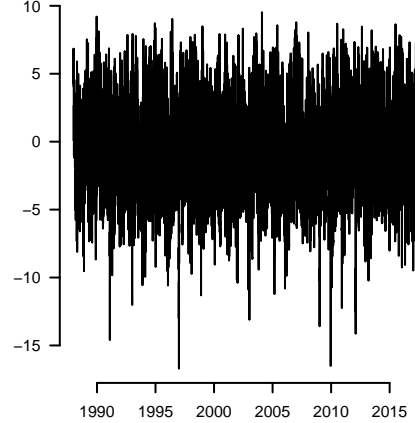**B**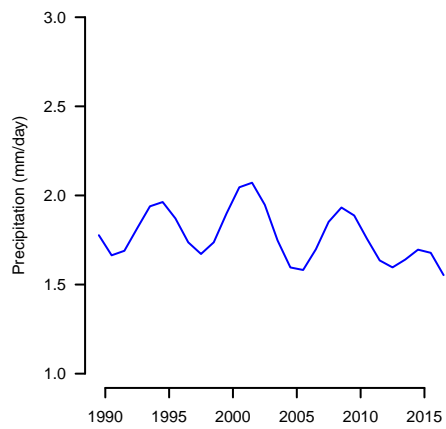**E**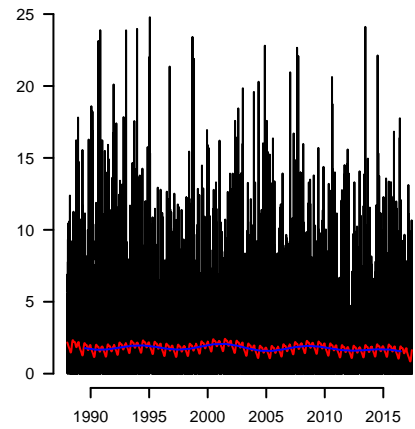**H**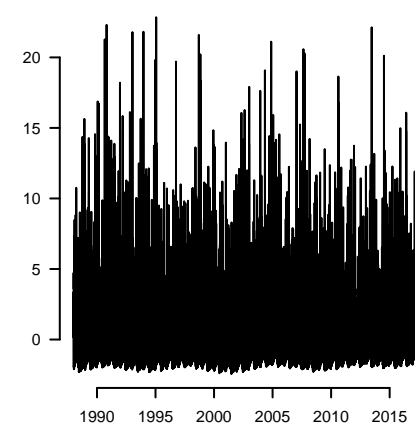**C**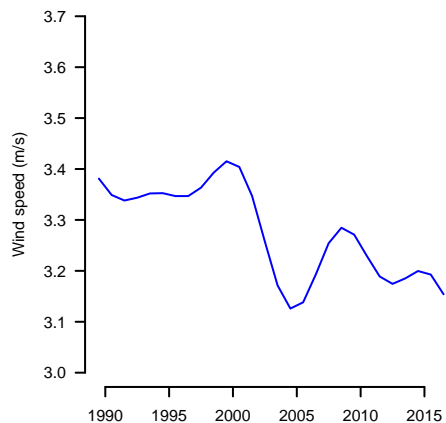**F**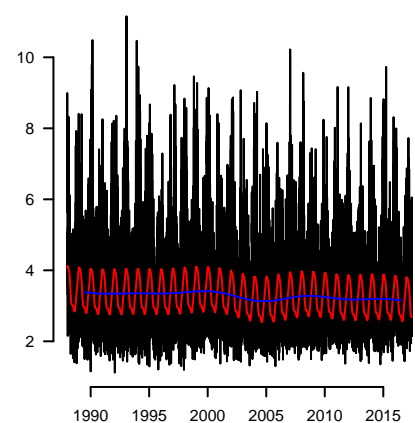**I**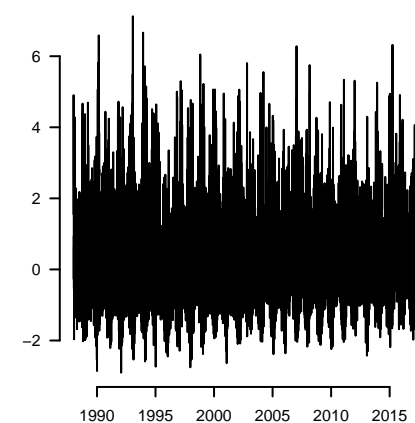

Supplement: Supplementary file [file 1]
