# Supplementary material
Source: publisher figshare collection journal article supplement (https://plos.figshare.com/articles/dataset/_/5511367)

**A**  
1989–1994

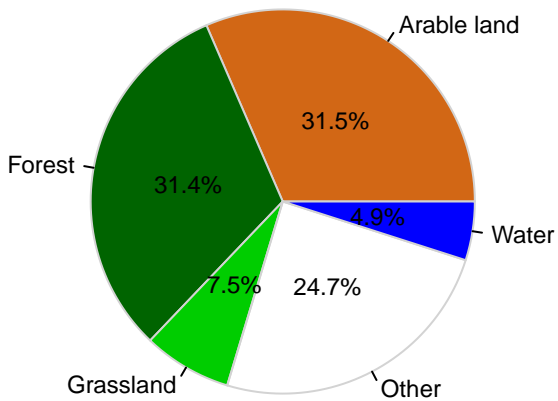

**B**  
2012–2014

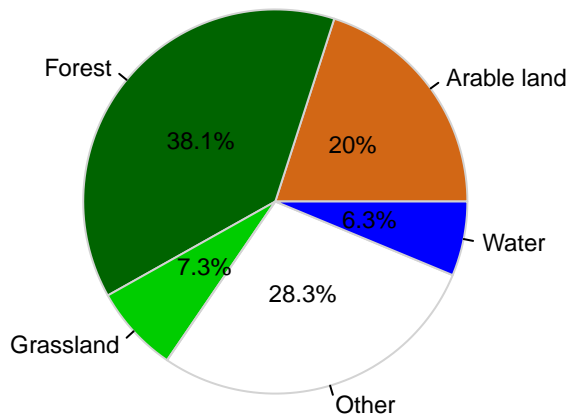

**C**

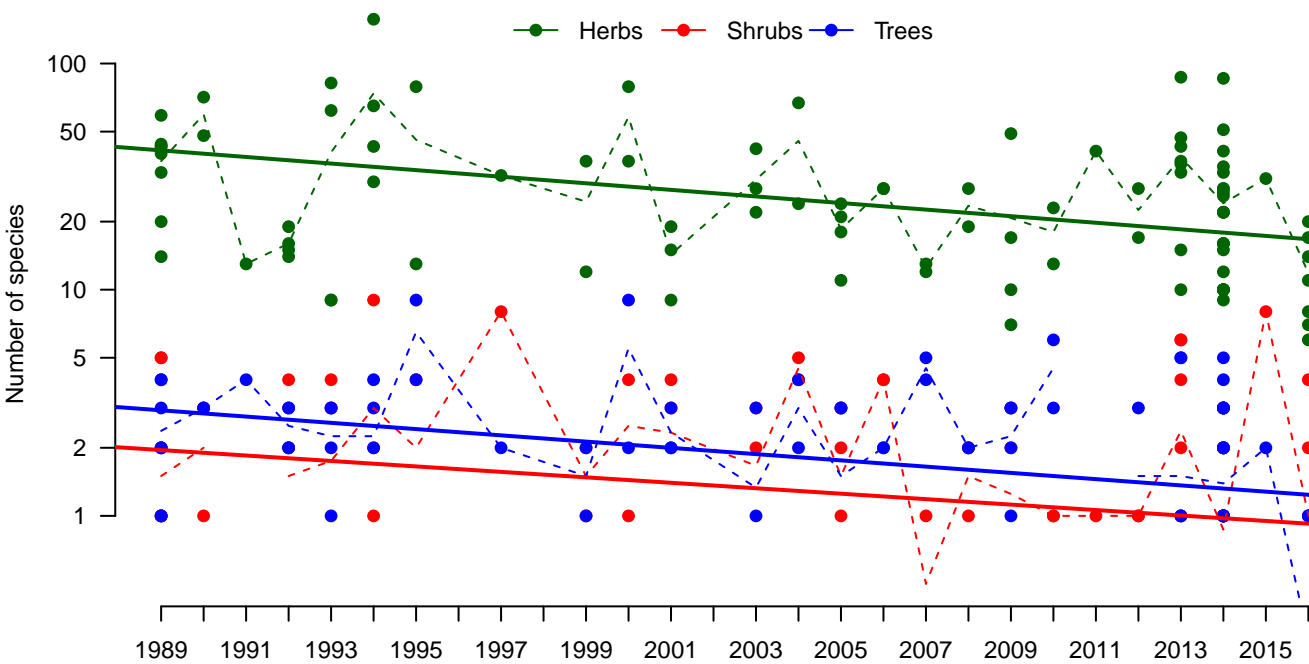

Supplement: Supplementary file [file 1]
