# Supplementary material
Source: publisher figshare collection journal article supplement (https://plos.figshare.com/articles/dataset/_/5511367)
Supplement: Supplementary file [file 1]

**S2 Table. Posterior parameter estimates of the mixed effects model including land use variables and interactions.** For each included variable, the corresponding coefficient posterior mean, standard deviation and 95% credible intervals are given. P-values are calculated empirically based on posterior distributions of coefficients.

| Variable                       | mean   | sd    | 2.50%  | 97.50% | P      |     |
|--------------------------------|--------|-------|--------|--------|--------|-----|
| Intercept                      | 2.551  | 0.146 | 2.248  | 2.832  | <0.001 | *** |
| Year                           | -0.084 | 0.007 | -0.098 | -0.068 | <0.001 | *** |
| Day number                     | -0.125 | 0.030 | -0.183 | -0.066 | <0.001 | *** |
| Day number <sup>2</sup>        | -0.631 | 0.026 | -0.681 | -0.578 | <0.001 | *** |
| Arable land                    | -0.848 | 0.191 | -1.212 | -0.467 | <0.001 | *** |
| Forest                         | -0.529 | 0.204 | -0.923 | -0.125 | 0.006  | **  |
| Grassland                      | 0.809  | 0.235 | 0.344  | 1.267  | <0.001 | *** |
| Water                          | -0.475 | 0.212 | -0.890 | -0.067 | 0.011  | *   |
| Habitat Cluster 2              | 0.449  | 0.102 | 0.246  | 0.651  | <0.001 | *** |
| Habitat Cluster 3              | 0.415  | 0.212 | -0.005 | 0.838  | 0.026  | *   |
| Year × Day number              | 0.001  | 0.001 | -0.002 | 0.004  | 0.215  |     |
| Year × Day number <sup>2</sup> | 0.011  | 0.001 | 0.009  | 0.014  | <0.001 | *** |
| Year × Arable land             | 0.040  | 0.009 | 0.022  | 0.057  | <0.001 | *** |
| Year × Forest                  | 0.030  | 0.011 | 0.007  | 0.050  | 0.005  | **  |
| Year × Grassland               | -0.062 | 0.014 | -0.090 | -0.033 | <0.001 | *** |
| Year × Water                   | 0.004  | 0.014 | -0.024 | 0.032  | 0.399  |     |
| $\sigma_{site}$                | 0.306  | 0.035 | 0.245  | 0.380  |        |     |
| $v$                            | 0.905  | 0.009 | 0.888  | 0.923  |        |     |
