# Supplementary material
Source: publisher figshare collection journal article supplement (https://plos.figshare.com/articles/dataset/_/5511367)
Supplement: Supplementary file [file 1]

**S1 Table. Posterior parameter estimates of the mixed effects model including weather variables.** For each included variable, the corresponding coefficient posterior mean, standard deviation and 95% credible intervals are given. P-values are calculated empirically based on posterior distributions of coefficients.

| Variable                              | mean   | sd    | 2.50%  | 97.50% | P      |     |
|---------------------------------------|--------|-------|--------|--------|--------|-----|
| Intercept                             | 1.947  | 0.086 | 1.772  | 2.112  | <0.001 | *** |
| log( $\lambda$ )                      | -0.058 | 0.002 | -0.062 | -0.054 | <0.001 | *** |
| Day number                            | -0.127 | 0.029 | -0.185 | -0.069 | <0.001 | *** |
| Day number <sup>2</sup>               | -0.437 | 0.030 | -0.495 | -0.378 | <0.001 | *** |
| Temperature                           | 0.298  | 0.023 | 0.251  | 0.343  | <0.001 | *** |
| Precipitation                         | -0.062 | 0.034 | -0.134 | 0.002  | 0.030  | *   |
| Wind speed                            | 0.005  | 0.026 | -0.046 | 0.057  | 0.418  |     |
| Frost days                            | -0.003 | 0.019 | -0.041 | 0.034  | 0.430  |     |
| Winter Precipitation                  | 0.025  | 0.019 | -0.012 | 0.062  | 0.096  | .   |
| Habitat Cluster 2                     | 0.298  | 0.090 | 0.117  | 0.479  | 0.001  | *** |
| Habitat Cluster 3                     | 0.264  | 0.199 | -0.121 | 0.649  | 0.091  | .   |
| Year $\times$ Day number              | -0.001 | 0.001 | -0.004 | 0.002  | 0.202  |     |
| Year $\times$ Day number <sup>2</sup> | 0.009  | 0.001 | 0.007  | 0.012  | <0.001 | *** |
| $\sigma_{site}$                       | 0.294  | 0.032 | 0.238  | 0.365  |        |     |
| $v$                                   | 0.884  | 0.009 | 0.866  | 0.902  |        |     |
